# Supplementary material
Source: Springer Nature journal article supplement (https://www.springermedizin.de/resource/supplementary/12913_2013_3170_MOESM1_ESM.pdf/9532588)

**Nursing Management Practices**

**System Control Parameters**

**Process Outcomes**

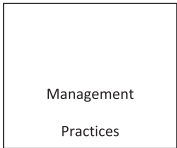

Alter →

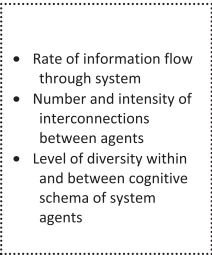

↔

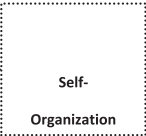

↔

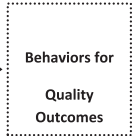

Supplement: MOESM1 [file 9532588]
